# Supplementary material for: Impact of Genetic Variability on Physiological Responses to Caffeine in Humans: A Systematic Review
Source: MDPI journal article supplement (doi:10.3390/nu10101373), 2018-09-25
Supplement: s1 [file s1]

| Search | Query                                                                                                                                                                  |
|--------|------------------------------------------------------------------------------------------------------------------------------------------------------------------------|
| #64    | Search (#60 NOT #63)                                                                                                                                                   |
| #63    | Search (#61 NOT #62)                                                                                                                                                   |
| #62    | Search humans[MeSH Terms]                                                                                                                                              |
| #61    | Search animals[MeSH Terms]                                                                                                                                             |
| #60    | Search (#16 AND #35 AND #59)                                                                                                                                           |
| #59    | Search (#36 OR #37 OR #38 OR #39 OR #40 OR #41 OR #42 OR #43 OR #44 OR #45 OR #46 OR #47 OR #48 OR #49 OR #50 OR #51 OR #52 OR #53 OR #54 OR #55 OR #56 OR #57 OR #58) |
| #58    | Search anxiety perseverance                                                                                                                                            |
| #57    | Search anxiety sensitivity[Title/Abstract]                                                                                                                             |
| #56    | Search anxiety[Title/Abstract]                                                                                                                                         |
| #55    | Search anxiety-like behavior[Title/Abstract]                                                                                                                           |
| #54    | Search anxiety-related behavior[Title/Abstract]                                                                                                                        |
| #53    | Search habitual caffeine users[Title/Abstract]                                                                                                                         |
| #52    | Search habitual caffeine intake[Title/Abstract]                                                                                                                        |
| #51    | Search habitual consumption[Title/Abstract]                                                                                                                            |
| #50    | Search habitual use[Title/Abstract]                                                                                                                                    |
| #49    | Search physical activity[Title/Abstract]                                                                                                                               |
| #48    | Search strength[Title/Abstract]                                                                                                                                        |
| #47    | Search muscle hypertrophy[Title/Abstract]                                                                                                                              |
| #46    | Search VO2peak[Title/Abstract]                                                                                                                                         |
| #45    | Search VO2max[Title/Abstract]                                                                                                                                          |
| #44    | Search aerobic performance[Title/Abstract]                                                                                                                             |
| #43    | Search motor activity performance[Title/Abstract]                                                                                                                      |
| #42    | Search sport performance[Title/Abstract]                                                                                                                               |
| #41    | Search training performance[Title/Abstract]                                                                                                                            |
| #40    | Search resistance training performance[Title/Abstract]                                                                                                                 |
| #39    | Search mobility performance[Title/Abstract]                                                                                                                            |
| #38    | Search cycling performance[Title/Abstract]                                                                                                                             |
| #37    | Search running performance[Title/Abstract]                                                                                                                             |
| #36    | Search exercise performance[Title/Abstract]                                                                                                                            |
| #35    | Search (#17 OR #18 OR #19 OR #20 OR #21 OR #22 OR #23 OR #24 OR #25 OR #26 OR #27 OR #28 OR #29 OR #30 OR #31 OR #32 OR #33 OR #34)                                    |
| #34    | Search AHR[Title/Abstract]                                                                                                                                             |
| #33    | Search aryl hydrocarbon receptor[Title/Abstract]                                                                                                                       |
| #32    | Search BDNF[Title/Abstract]                                                                                                                                            |
| #31    | Search brain derived neurotrophic factor[Title/Abstract]                                                                                                               |
| #30    | Search ADORA1[Title/Abstract]                                                                                                                                          |
| #29    | Search Adenosine A1 Receptor[Title/Abstract]                                                                                                                           |
| #28    | Search ADORA2A[Title/Abstract]                                                                                                                                         |

- #27 Search Adenosine A2a Receptor[Title/Abstract]
- #26 Search CYP1A1[Title/Abstract]
- #25 Search Cytochrome P450 1A1[Title/Abstract]
- #24 Search CYP1A2[Title/Abstract]
- #23 Search Cytochrome P450 1A2[Title/Abstract]
- #22 Search genotype[Title/Abstract]
- #21 Search genome[Title/Abstract]
- #20 Search single nucleotide polymorphism[Title/Abstract]
- #19 Search genetic polymorphism[Title/Abstract]
- #18 Search genotype variations[Title/Abstract]
- #17 Search SNP's[Title/Abstract]
- Search (#1 OR #2 OR #3 OR #4 OR #5 OR #6 OR #7 OR #8 OR #9 OR #10 OR #11 OR #12 OR #13 OR #14 OR #15)
- #16
- #15 Search caffeine mouth rinse[Title/Abstract]
- #14 Search caffeine-rich beverages[Title/Abstract]
- #13 Search gene-caffeine[Title/Abstract]
- #12 Search dose[Title/Abstract]
- #11 Search ingestion[Title/Abstract]
- #10 Search caffeine-maltodextrin[Title/Abstract]
- #9 Search caffeine-containing[Title/Abstract]
- #8 Search alternate forms of caffeine[Title/Abstract]
- #7 Search supplementation[Title/Abstract]
- #6 Search intake[Title/Abstract]
- #5 Search caffeinated gum[Title/Abstract]
- #4 Search consumption[Title/Abstract]
- #3 Search treatment[Title/Abstract]
- #2 Search coffee[Title/Abstract]
- #1 Search caffeine[Title/Abstract]
