# Supplementary figures and images for: Impact of Genetic Variability on Physiological Responses to Caffeine in Humans: A Systematic Review
Source: MDPI journal article supplement (doi:10.3390/nu10101373), 2018-09-25

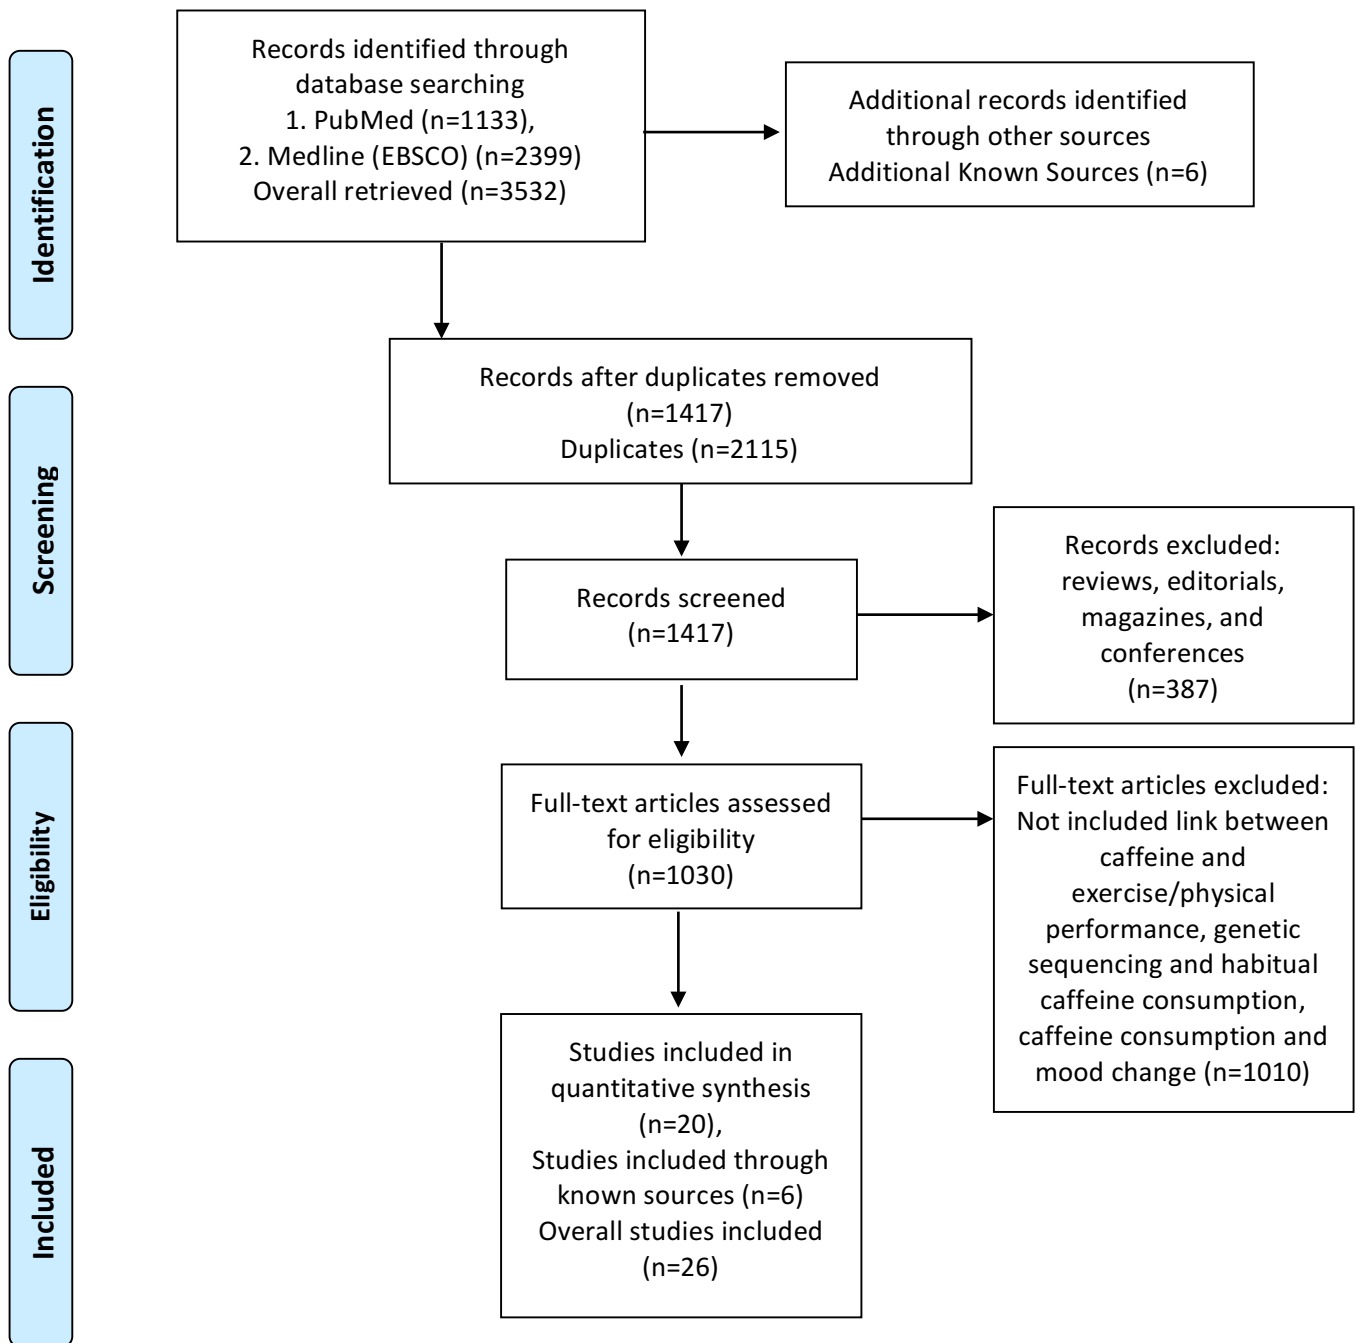

Supplement: s1 [file s1]
